# Supplementary material
Source: PubMed Central journal article supplement (PMC3493154)
Supplement: NIHMS410256-supplement-Supplemental_Figure_1.pdf [file NIHMS410256-supplement-Supplemental_Figure_1.pdf]

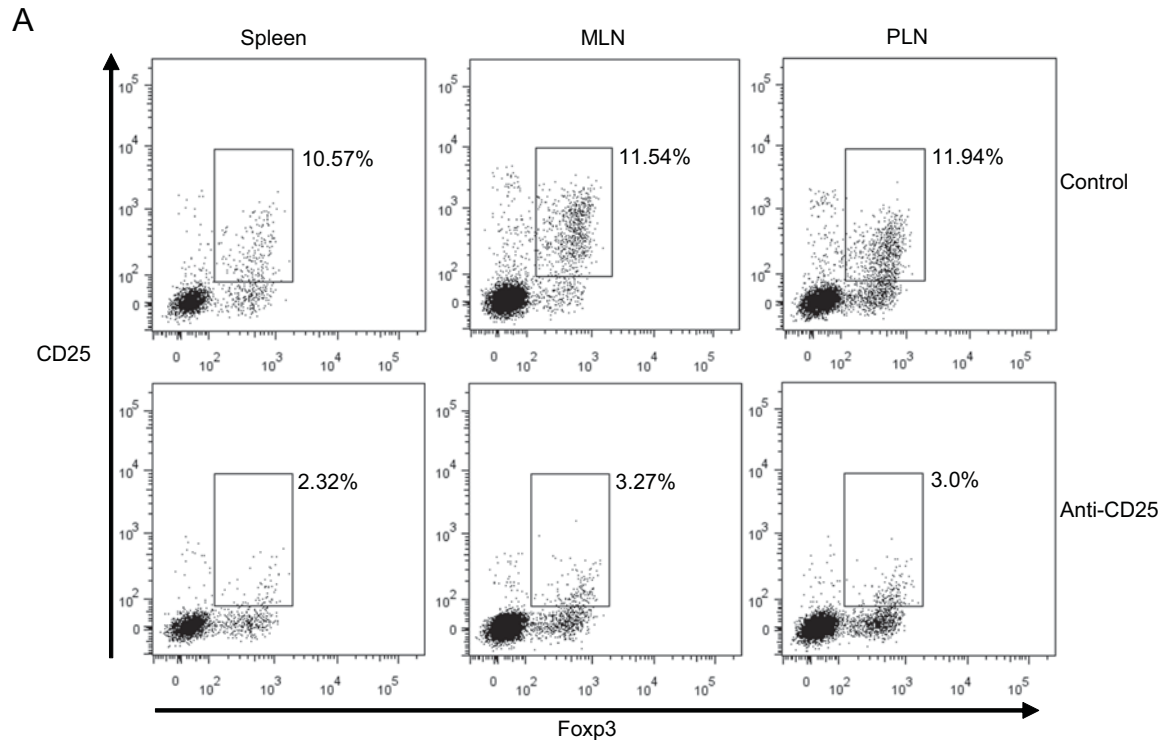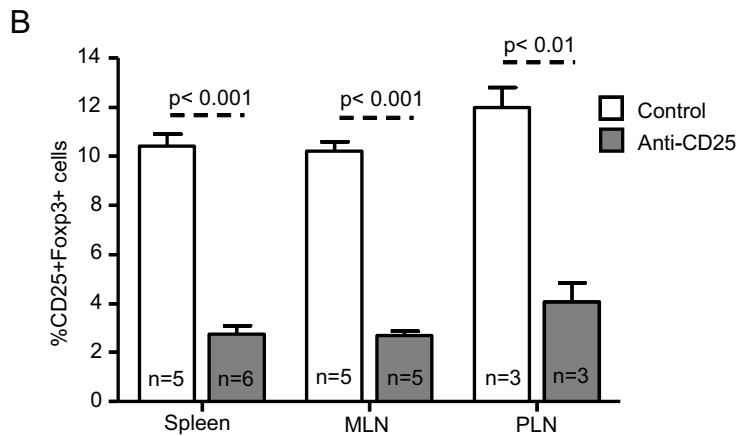

**SUPPLEMENTAL FIGURE 1.** Anti-CD25 antibody treatment partially depletes Tregs. (A) NOD-DQ8 mice were treated with two i.p. injections of anti-CD25 antibodies or PBS, one week apart. Splenocytes, MLN cells, and PLN cells were collected from PBS treated control mice (top panels) and anti-CD25 treated mice (bottom panels) one week following the second injection and stained with mAbs for CD4, CD25, and Foxp3. Lymphocytes are gated on CD4<sup>+</sup> cells. Numbers represent the percentage of CD25<sup>+</sup>Foxp3<sup>+</sup> lymphocytes falling within the gate. Representative plots from 3 independent experiments are shown. (B) Quantification of data in A for multiple control and anti-CD25 mAb treated mice (n=3-6 per group). Data represented as mean  $\pm$  SEM. P values computed using an unpaired t-test.
