# Supplementary material
Source: PubMed Central journal article supplement (PMC3493154)
Supplement: NIHMS410256-supplement-Supplemental_Figure_2.pdf [file NIHMS410256-supplement-Supplemental_Figure_2.pdf]

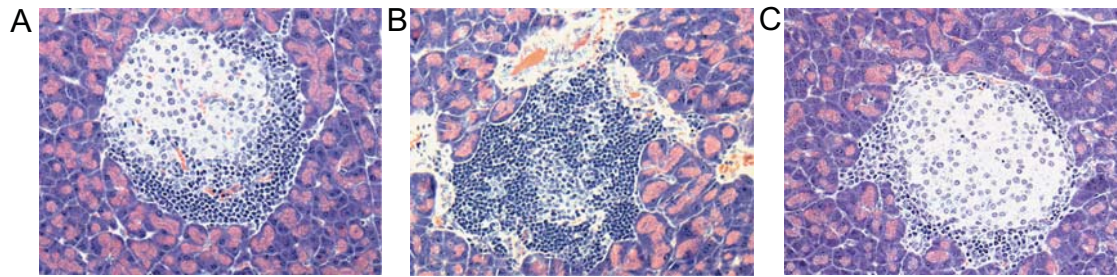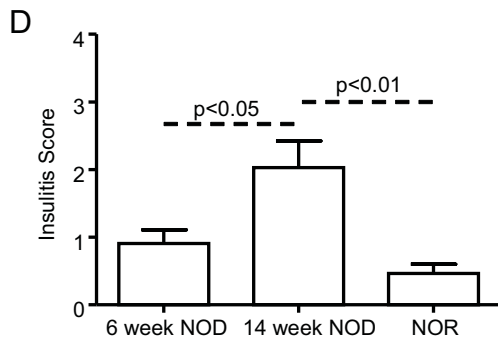

**SUPPLEMENTAL FIGURE 2.** Insulitis scores in NOR and NOD mice. Insulitis was determined by evaluating H&E stained sections of the pancreas for islet infiltration, scoring each islet from grade 0 (no infiltration) to grade 4 (end-stage insulitis with <20% of islet mass remaining). An average insulitis score was determined for each group of mice. (A) 6-week old NOD mice, (B) 14-week old NOD mice, and (C) 14-week old NOR mice. Original magnification, x10. (D) Quantification of insulitis index for multiple mice (n=8 per group). Data represented as mean  $\pm$  SEM. P values computed using an ANOVA with a post-hoc test for multiple comparisons.
