# Supplementary material
Source: PubMed Central journal article supplement (PMC3493154)
Supplement: NIHMS410256-supplement-Supplemental_Figure_3.pdf [file NIHMS410256-supplement-Supplemental_Figure_3.pdf]

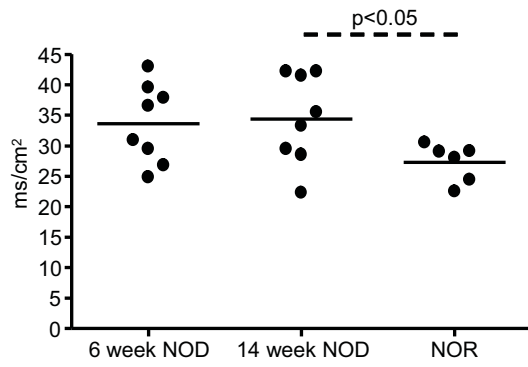

**SUPPLEMENTAL FIGURE 3.** Intestinal barrier function in NOR and NOD mice. Sections of small intestine were mounted in Ussing chambers and tissue conductance ( $\text{mS}/\text{cm}^2$ ) was measured in 6-week old NOD mice, 14-week old NOD mice, and NOR mice. Each dot represents an individual mouse. P values computed using an unpaired T-test.
